# Supplementary material for: Selective concentration of iron, titanium, and zirconium substrate minerals within Gregory’s diverticulum, an organ unique to derived sand dollars (Echinoidea: Scutelliformes)
Source: PeerJ. 2024 Apr 5;12:e17178. doi: 10.7717/peerj.17178 (PMC11000648; doi:10.7717/peerj.17178)
Supplement: Supplemental Information 1 — All data are in mole fraction. [file peerj-12-17178-s001.xlsx]

## Sheet: Sheet1
Order	Notation	ID	Mineral	O	C	Si	Mg	Al	Ti	Fe	Zr	K	Na	N	Ca	S	P	Cl	Ni	Mn	Mo	Cu	Ba	V	B	Rb	Nb	Pt	Hg	Br	Hf	F	Yb	Cr	Co	W	Tl	Ir	Nd	Zn	Ar	Ru
1	Playa Organos, CR Sediment	Sample-5-1-01	Ilmenite	0.6505	0.1346	0.021	0.0135	0.0154	0.092	0.0731	0	0	0	0	0	0	0	0	0	0	0	0	0	0	0	0	0	0	0	0	0	0	0	0	0	0	0	0	0	0	0	0
2	Playa Organos, CR Sediment	Sample-5-1-02	Ilmenite	0.5617	0.2383	0.0138	0.0115	0.0104	0.0579	0.106	0	0	0	0	0.0005	0	0	0	0	0	0	0	0	0	0	0	0	0	0	0	0	0	0	0	0	0	0	0	0	0	0	0
3	Playa Organos, CR Sediment	Sample-5-1-03	Ilmenite	0.6074	0.2136	0.0175	0.0143	0.0114	0.0646	0.0702	0	0.001	0	0	0	0	0	0	0	0	0	0	0	0	0	0	0	0	0	0	0	0	0	0	0	0	0	0	0	0	0	0
4	Playa Organos, CR Sediment	Sample-5-2-04	Amphibole	0.3311	0.5831	0.0321	0.0101	0.0125	0.0026	0.0195	0	0.0012	0.0033	0	0.0046	0	0	0	0	0	0	0	0	0	0	0	0	0	0	0	0	0	0	0	0	0	0	0	0	0	0	0
5	Playa Organos, CR Sediment	Sample-5-3-05	Magnetite	0.5719	0.1416	0.0009	0.0075	0.0087	0.0229	0.2464	0	0	0	0	0	0	0	0	0	0	0	0	0	0	0	0	0	0	0	0	0	0	0	0	0	0	0	0	0	0	0	0
6	Playa Organos, CR Sediment	Sample-5-3-06	Magnetite	0.5458	0.0792	0.0085	0.0049	0.0077	0.0378	0.3162	0	0	0	0	0	0	0	0	0	0	0	0	0	0	0	0	0	0	0	0	0	0	0	0	0	0	0	0	0	0	0	0
7	Playa Organos, CR Sediment	Sample-5-3-07	Magnetite	0.4168	0.3827	0.0209	0.0086	0.0155	0.0162	0.1372	0	0.0011	0	0	0.001	0	0	0	0	0	0	0	0	0	0	0	0	0	0	0	0	0	0	0	0	0	0	0	0	0	0	0
8	Playa Organos, CR Sediment	Sample-5-5-13	Amphibole	0.5877	0.1983	0.1035	0.0389	0.0112	0.002	0.0308	0	0	0	0	0.0278	0	0	0	0	0	0	0	0	0	0	0	0	0	0	0	0	0	0	0	0	0	0	0	0	0	0	0
9	Playa Organos, CR Sediment	Sample-5-5-14	Magnetite	0.2536	0.6736	0.0088	0.0032	0.0057	0	0.0441	0	0	0.0027	0	0.0077	0	0	0	0.0005	0	0	0	0	0	0	0	0	0	0	0	0	0	0	0	0	0	0	0	0	0	0	0
10	Playa Organos, CR Sediment	Sample-5-6-16	Amphibole	0.3969	0.4874	0.0552	0.0413	0.0035	0	0.0129	0	0	0	0	0.0027	0	0	0	0	0	0	0	0	0	0	0	0	0	0	0	0	0	0	0	0	0	0	0	0	0	0	0
11	Playa Organos, CR Sediment	Sample-5-7-18	Magnetite	0.3849	0.431	0.0201	0.0141	0.0112	0.0193	0.1165	0	0.0005	0	0	0.0005	0	0	0	0	0	0	0	0	0.002	0	0	0	0	0	0	0	0	0	0	0	0	0	0	0	0	0	0
12	Playa Organos, CR Sediment	Sample-5-8-19	Magnetite	0.499	0.2497	0.0452	0.0243	0.0284	0.0333	0.1133	0	0.0017	0	0	0.0011	0	0	0	0	0.004	0	0	0	0	0	0	0	0	0	0	0	0	0	0	0	0	0	0	0	0	0	0
13	Encope michelini Ft Walton	Sample-2-1-27	Zircon	0.6585	0.2113	0.0658	0	0	0.0004	0	0.064	0	0	0	0	0	0	0	0	0	0	0	0	0	0	0	0	0	0	0	0	0	0	0	0	0	0	0	0	0	0	0
14	Encope michelini Ft Walton	Sample-2-1-28	Calcite	0.597	0.3062	0.0073	0.0007	0.0006	0	0.0043	0	0	0	0	0.0822	0.0005	0.0006	0.0005	0	0	0	0	0	0	0	0	0	0	0	0	0	0	0.0001	0	0	0	0	0	0	0	0	0
15	Encope michelini Ft Walton	Sample-2-1-29	Quartz	0.7187	0.1101	0.1705	0	0	0	0	0	0	0.0008	0	0	0	0	0	0	0	0	0	0	0	0	0	0	0	0	0	0	0	0	0	0	0	0	0	0	0	0	0
16	Encope michelini Ft Walton	Sample-2-1-30	Ilmenite	0.6901	0.101	0.0041	0	0.0008	0.1141	0.0774	0	0	0	0	0.0017	0	0	0	0	0.0108	0	0	0	0	0	0	0	0	0	0	0	0	0	0	0	0	0	0	0	0	0	0
17	Encope michelini Ft Walton	Sample-2-1-31	Kyanite	0.695	0.1015	0.0586	0	0.1439	0	0	0	0	0	0	0	0	0.0006	0	0	0	0	0	0	0	0	0	0	0	0	0	0	0	0	0	0	0	0	0	0	0	0.0004	0
18	Encope michelini Ft Walton	Sample-2-1-32	Ilmenite	0.647	0.0705	0.0009	0.0021	0.0009	0.1535	0.1199	0	0	0	0	0	0	0	0	0	0.0051	0	0	0	0	0	0	0	0	0	0	0	0	0	0	0	0	0	0	0	0	0	0
19	Encope michelini Ft Walton	Sample-2-1-33	Zircon	0.6032	0.2777	0.0578	0	0	0.0004	0.0004	0.0588	0	0	0	0	0	0	0	0	0	0	0	0	0	0	0	0	0	0	0	0.0016	0	0	0	0	0	0	0	0	0	0	0
20	Encope michelini Ft Walton	Sample-2-1-24	Ilmenite	0.7064	0.0705	0	0	0	0.1388	0.0821	0	0	0	0	0	0	0	0	0	0.0021	0	0	0	0	0	0	0	0	0	0	0	0	0	0	0	0	0	0	0	0	0	0
21	Mellita notabilis Puerto Vallarta	Sample-9-1-01.tif	Quartz	0.6947	0.1514	0.1457	0.0007	0.0013	0	0	0.0062	0	0	0	0	0	0	0	0	0	0	0	0	0	0	0	0	0	0	0	0	0	0	0	0	0	0	0	0	0	0	0
22	Mellita notabilis Puerto Vallarta	Sample-9-1-02.tif	Zircon	0.45	0.3542	0.0425	0	0	0	0	0.0454	0	0	0	0	0	0	0	0	0	0	0	0	0	0.1072	0	0	0	0	0	0.0007	0	0	0	0	0	0	0	0	0	0	0
23	Mellita notabilis Puerto Vallarta	Sample-9-1-03.tif	Zircon	0.643	0.2579	0.0489	0	0	0	0	0.0503	0	0	0	0	0	0	0	0	0	0	0	0	0	0	0	0	0	0	0	0	0	0	0	0	0	0	0	0	0	0	0
24	Mellita notabilis Puerto Vallarta	Sample-9-1-04.tif	Magnetite	0.5746	0.1846	0.0008	0.0137	0.0115	0.0308	0.184	0	0	0	0	0	0	0	0	0	0	0	0	0	0	0	0	0	0	0	0	0	0	0	0	0	0	0	0	0	0	0	0
25	Mellita notabilis Puerto Vallarta	Sample-9-1-05.tif	Ilmenite	0.5161	0.2214	0.0077	0	0.0018	0.1574	0.0841	0	0	0	0	0.0078	0	0.0008	0	0	0.0031	0	0	0	0	0	0	0	0	0	0	0	0	0	0	0	0	0	0	0	0	0	0
26	Mellita notabilis Puerto Vallarta	Sample-9-1-06.tif	Ilmenite	0.6069	0.2028	0.0008	0	0.0008	0.0988	0.0892	0	0	0	0	0	0	0.0007	0	0	0	0	0	0	0	0	0	0	0	0	0	0	0	0	0	0	0	0	0	0	0	0	0
27	Mellita notabilis Puerto Vallarta	Sample-9-1-07.tif	Magnetite	0.4985	0.3091	0.0008	0	0.0008	0.0005	0.189	0	0	0	0	0.0006	0	0.0007	0	0	0	0	0	0	0	0	0	0	0	0	0	0	0	0	0	0	0	0	0	0	0	0	0
28	Mellita notabilis Puerto Vallarta	Sample-9-2-08.tif	Ilmenite	0.6478	0.2371	0.008	0	0.007	0.0484	0.0503	0	0	0	0	0	0	0	0	0	0.0014	0	0	0	0	0	0	0	0	0	0	0	0	0	0	0	0	0	0	0	0	0	0
29	Mellita notabilis Puerto Vallarta	Sample-9-2-09.tif	Garnet	0.3306	0.5456	0.0534	0	0.0185	0.002	0.0306	0.0002	0.0004	0.0182	0	0.0004	0	0	0	0	0	0	0	0	0	0	0	0	0	0	0	0	0	0	0	0	0	0	0	0	0	0	0
30	Mellita notabilis Puerto Vallarta	Sample-9-2-10.tif	Magnetite	0.0779	0.597	0.0019	0	0.001	0.0006	0.3191	0.002	0	0	0	0	0	0	0	0.0005	0	0	0	0	0	0	0	0	0	0	0	0	0	0	0	0	0	0	0	0	0	0	0
31	Mellita notabilis Puerto Vallarta	Sample-9-2-11.tif	Magnetite	0.4984	0.2117	0.0286	0.001	0.0214	0.0005	0.2349	0	0.0006	0	0	0	0.0008	0.0008	0.0007	0	0	0	0	0	0.0005	0	0	0	0	0	0	0	0	0	0	0	0	0	0	0	0	0	0
32	Mellita notabilis Puerto Vallarta	Sample-9-2-12.tif	Magnetite	0.6201	0.1477	0	0	0.0009	0.0005	0.2303	0	0	0	0	0	0	0	0	0	0	0	0	0	0.0005	0	0	0	0	0	0	0	0	0	0	0	0	0	0	0	0	0	0
33	Mellita notabilis Puerto Vallarta	Sample-9-2-13.tif	Magnetite	0.2652	0.2025	0.0013	0	0.0013	0.0008	0.529	0	0	0	0	0	0	0	0	0	0	0	0	0	0	0	0	0	0	0	0	0	0	0	0	0	0	0	0	0	0	0	0
34	Mellita notabilis Puerto Vallarta	Sample-9-3-14.tif	Unknown	0.2457	0.701	0.0081	0	0.0034	0.0003	0.0314	0.0067	0	0	0	0	0	0.0005	0	0.0029	0	0	0	0	0	0	0	0	0	0	0	0	0	0	0	0	0	0	0	0	0	0	0
35	Mellita notabilis Puerto Vallarta	Sample-9-3-15.tif	Magnetite	0.6591	0.1739	0	0	0	0.0005	0.1661	0	0	0	0	0	0	0	0	0	0	0	0	0	0.0004	0	0	0	0	0	0	0	0	0	0	0	0	0	0	0	0	0	0
36	Mellita notabilis Puerto Vallarta	Sample-9-3-16.tif	Apatite	0.6495	0.0995	0	0	0	0	0	0	0	0	0	0.1112	0	0.0841	0	0	0	0	0	0	0	0	0	0	0	0	0	0	0.0545	0.0012	0	0	0	0	0	0	0	0	0
37	Mellita notabilis Puerto Vallarta	Sample-9-3-17.tif	Zircon	0.76	0.1419	0.0493	0	0	0	0	0.0471	0	0	0	0	0	0	0	0.0003	0	0	0	0	0	0	0	0	0	0	0	0.0012	0	0	0	0	0	0	0	0	0	0	0
38	Mellita notabilis Puerto Vallarta	Sample-9-3-18.tif	Magnetite	0.1842	0.5038	0.008	0.001	0.0009	0.073	0.1907	0.0005	0	0	0	0.0355	0.0008	0.0008	0.0007	0	0	0	0	0	0	0	0	0	0	0	0	0	0	0	0	0	0	0	0	0	0	0	0
39	Mellita notabilis Puerto Vallarta	Sample-9-3-19.tif	Magnetite	0.1036	0.5799	0.0036	0	0.0009	0.0069	0.1389	0.0006	0	0	0	0	0	0	0	0.0004	0	0	0	0	0	0	0	0	0	0	0	0	0	0	0.1652	0	0	0	0	0	0	0	0
40	Mellita notabilis Puerto Vallarta	Sample-9-3-20.tif	Ilmenite	0.6635	0.0821	0.0009	0	0.0009	0.1363	0.0984	0	0	0	0	0	0	0	0	0	0.0179	0	0	0	0	0	0	0	0	0	0	0	0	0	0	0	0	0	0	0	0	0	0
41	Mellita notabilis Puerto Vallarta	Sample-9-3-21.tif	Magnetite	0.5877	0.1964	0.0042	0	0.0035	0.0005	0.207	0	0	0	0	0	0	0.0008	0	0	0	0	0	0	0	0	0	0	0	0	0	0	0	0	0	0	0	0	0	0	0	0	0
42	Mellita notabilis Puerto Vallarta	Sample-9-3-22.tif	Ilmenite	0.6445	0.1193	0	0	0	0.1326	0.0984	0	0	0	0	0	0	0	0	0	0.0052	0	0	0	0	0	0	0	0	0	0	0	0	0	0	0	0	0	0	0	0	0	0
43	Mellita notabilis Puerto Vallarta	Sample-9-3-23.tif	Magnetite	0.6135	0.0914	0	0.0011	0.0119	0.0357	0.2464	0	0	0	0	0	0	0	0	0	0	0	0	0	0	0	0	0	0	0	0	0	0	0	0	0	0	0	0	0	0	0	0
44	Mellita notabilis Puerto Vallarta	Sample-9-4-24.tif	Unknown	0.177	0.7757	0.0069	0	0.0033	0	0.0242	0.0089	0	0	0	0	0	0	0	0.004	0	0	0	0	0	0	0	0	0	0	0	0	0	0	0	0	0	0	0	0	0	0	0
45	Mellita notabilis Puerto Vallarta	Sample-9-4-25.tif	Magnetite	0.6492	0.183	0	0	0	0.0005	0.1614	0	0	0	0	0	0	0	0	0	0	0	0	0	0	0	0	0	0	0	0	0	0	0	0	0.006	0	0	0	0	0	0	0
46	Mellita notabilis Puerto Vallarta	Sample-9-4-26.tif	Ilmenite	0.6782	0.0953	0.0017	0	0.0043	0.134	0.0707	0	0	0	0	0	0	0.0008	0.0007	0	0.0145	0	0	0	0	0	0	0	0	0	0	0	0	0	0	0	0	0	0	0	0	0	0
47	Mellita notabilis Puerto Vallarta	Sample-9-4-27.tif	Magnetite	0.637	0.0906	0.0009	0.0094	0.0009	0.1066	0.1545	0	0	0	0	0	0	0	0	0	0	0	0	0	0	0	0	0	0	0	0	0	0	0	0	0	0	0	0	0	0	0	0
48	Mellita notabilis Puerto Vallarta	Sample-9-4-28.tif	Magnetite	0.6515	0.1451	0	0	0	0.0005	0.2024	0	0	0	0	0	0	0	0	0	0	0	0	0	0.0005	0	0	0	0	0	0	0	0	0	0	0	0	0	0	0	0	0	0
49	Mellita notabilis Puerto Vallarta	Sample-9-4-29.tif	Magnetite	0.5976	0.0932	0	0	0	0	0.3092	0	0	0	0	0	0	0	0	0	0	0	0	0	0	0	0	0	0	0	0	0	0	0	0	0	0	0	0	0	0	0	0
50	Mellita notabilis Puerto Vallarta	Sample-9-4-30.tif	Magnetite	0.6251	0.1034	0.0009	0	0	0	0.2629	0	0	0	0	0	0	0	0	0	0	0	0	0	0.0005	0	0	0	0	0	0	0	0	0	0	0.0072	0	0	0	0	0	0	0
51	Mellita notabilis Puerto Vallarta	Sample-9-4-31.tif	Magnetite	0.5855	0.0959	0	0	0	0	0.2965	0	0	0	0.0215	0	0	0	0	0	0	0	0	0	0.0005	0	0	0	0	0	0	0	0	0	0	0	0	0	0	0	0	0	0
52	Mellita notabilis Puerto Vallarta	Sample-9-4-32.tif	Magnetite	0.5953	0.2448	0.0082	0	0.0062	0.0004	0.1402	0	0.0005	0	0	0	0	0	0	0	0	0	0	0	0	0	0	0	0	0	0	0	0	0	0	0.0043	0	0	0	0	0	0	0
53	Mellita tenuis Esate Sale	Sample-10-1-33.tif	Kyanite	0.6565	0.0925	0.0757	0	0.1692	0	0	0	0	0.0008	0	0	0	0.0054	0	0	0	0	0	0	0	0	0	0	0	0	0	0	0	0	0	0	0	0	0	0	0	0	0
54	Mellita tenuis Esate Sale	Sample-10-1-34.tif	Rutile	0.7636	0.0716	0.0007	0	0	0.1641	0	0	0	0	0	0	0	0	0	0	0	0	0	0	0	0	0	0	0	0	0	0	0	0	0	0	0	0	0	0	0	0	0
55	Mellita tenuis Esate Sale	Sample-10-1-35.tif	Garnet	0.5498	0.2276	0.1048	0.0008	0.0614	0.0024	0.0419	0.009	0.0005	0	0	0.0005	0	0.0006	0.0005	0	0	0	0	0	0	0	0	0	0	0	0	0	0	0	0	0	0	0	0	0	0	0	0
56	Mellita tenuis Esate Sale	Sample-10-1-36.tif	Zircon	0.6475	0.2704	0.0413	0	0	0	0	0.0396	0	0.0008	0	0	0	0	0	0.0003	0	0	0	0	0	0	0	0	0	0	0	0	0	0	0	0	0	0	0	0	0	0	0
57	Mellita tenuis Esate Sale	Sample-10-1-37.tif	Zircon	0.6595	0.1662	0.0834	0	0	0	0	0.0905	0	0	0	0	0	0	0	0.0004	0	0	0	0	0	0	0	0	0	0	0	0	0	0	0	0	0	0	0	0	0	0	0
58	Mellita tenuis Esate Sale	Sample-10-1-38.tif	Zircon	0.6257	0.2283	0.072	0.0009	0.0062	0	0	0.0666	0	0	0	0	0	0	0	0	0	0	0	0	0	0	0	0	0	0	0	0.0001	0	0	0	0	0	0	0	0	0	0	0.0002
59	Mellita tenuis Esate Sale	Sample-10-1-39.tif	Kyanite	0.683	0.0782	0.0799	0	0.1581	0	0	0	0	0.0008	0	0	0	0	0	0	0	0	0	0	0	0	0	0	0	0	0	0	0	0	0	0	0	0	0	0	0	0	0
60	Mellita tenuis Esate Sale	Sample-10-1-40.tif	Zircon	0.5223	0.3915	0.0357	0.0007	0.0007	0.0112	0.0045	0.033	0	0	0	0	0	0	0	0.0003	0	0	0	0	0	0	0	0	0	0	0	0	0	0	0	0	0	0	0	0	0	0	0
61	Mellita tenuis Esate Sale	Sample-10-2-41.tif	Quartz	0.7235	0.0798	0.196	0	0	0	0	0	0	0.0008	0	0	0	0	0	0	0	0	0	0	0	0	0	0	0	0	0	0	0	0	0	0	0	0	0	0	0	0	0
62	Mellita tenuis Esate Sale	Sample-10-2-42.tif	Rutile	0.8	0.0782	0.0007	0	0.0007	0.1204	0	0	0	0	0	0	0	0	0	0	0	0	0	0	0	0	0	0	0	0	0	0	0	0	0	0	0	0	0	0	0	0	0
63	Mellita tenuis Esate Sale	Sample-10-2-43.tif	Rutile	0.7933	0.0915	0.0007	0	0.0007	0.113	0	0	0	0.0008	0	0	0	0	0	0	0	0	0	0	0	0	0	0	0	0	0	0	0	0	0	0	0	0	0	0	0	0	0
64	Mellita tenuis Esate Sale	Sample-10-2-44.tif	Rutile	0.7815	0.0987	0	0	0.0007	0.1188	0.0003	0	0	0	0	0	0	0	0	0	0	0	0	0	0	0	0	0	0	0	0	0	0	0	0	0	0	0	0	0	0	0	0
65	Mellita tenuis Esate Sale	Sample-10-2-45.tif	Kyanite	0.6987	0.1384	0.048	0.0007	0.1122	0.0004	0.0003	0	0	0.0008	0	0	0	0.0006	0	0	0	0	0	0	0	0	0	0	0	0	0	0	0	0	0	0	0	0	0	0	0	0	0
66	Mellita tenuis Esate Sale	Sample-10-2-46.tif	Ilmenite	0.697	0.052	0.0009	0	0	0.2428	0.0034	0	0	0	0	0	0	0	0	0	0	0	0	0	0	0	0	0.0039	0	0	0	0	0	0	0	0	0	0	0	0	0	0	0
67	Mellita tenuis Esate Sale	Sample-10-2-47.tif	Rutile	0.7178	0.0463	0.0049	0	0.0069	0.2228	0	0.0013	0	0	0	0	0	0	0	0	0	0	0	0	0	0	0	0	0	0	0	0	0	0	0	0	0	0	0	0	0	0	0
68	Mellita tenuis Esate Sale	Sample-10-2-48.tif	Rutile	0.7497	0.065	0.0008	0	0	0.1844	0	0	0	0	0	0	0	0	0	0	0	0	0	0	0	0	0	0	0	0	0	0	0	0	0	0	0.0001	0	0	0	0	0	0
69	Mellita tenuis Esate Sale	Sample-10-2-49.tif	Rutile	0.7973	0.1022	0.0007	0	0.0007	0.0953	0.0003	0.0004	0	0.0008	0	0	0	0	0	0	0	0	0	0	0	0	0	0.0022	0	0	0	0	0	0	0	0	0	0	0	0	0	0	0
70	Mellita tenuis Esate Sale	Sample-10-2-50.tif	Zircon	0.4349	0.3689	0.0331	0	0.0006	0	0	0.0276	0	0	0	0	0	0	0	0.0003	0	0	0	0	0	0.1346	0	0	0	0	0	0	0	0	0	0	0	0	0	0	0	0	0
71	Mellita tenuis Esate Sale	Sample-10-2-51.tif	Zircon	0.5788	0.2541	0.0806	0	0.0008	0	0	0.0853	0	0	0	0	0	0	0	0.0004	0	0	0	0	0	0	0	0	0	0	0	0	0	0	0	0	0	0	0	0	0	0	0
72	Mellita tenuis Esate Sale	Sample-10-3-52.tif	Quartz	0.7193	0.1102	0.1681	0.0007	0.0007	0	0.0003	0	0	0.0008	0	0	0	0	0	0	0	0	0	0	0	0	0	0	0	0	0	0	0	0	0	0	0	0	0	0	0	0	0
73	Mellita tenuis Esate Sale	Sample-10-3-53.tif	Zircon	0.661	0.2032	0.0688	0	0	0	0	0.0666	0	0	0	0	0	0	0	0.0004	0	0	0	0	0	0	0	0	0	0	0	0	0	0	0	0	0	0	0	0	0	0	0
74	Mellita tenuis Esate Sale	Sample-10-3-54.tif	Quartz	0.7267	0.092	0.1806	0	0	0	0	0	0	0.0008	0	0	0	0	0	0	0	0	0	0	0	0	0	0	0	0	0	0	0	0	0	0	0	0	0	0	0	0	0
75	Mellita tenuis Esate Sale	Sample-10-3-55.tif	Quartz	0.5614	0.2244	0.2125	0	0	0.0004	0.0003	0	0	0.0008	0	0	0	0	0	0.0003	0	0	0	0	0	0	0	0	0	0	0	0	0	0	0	0	0	0	0	0	0	0	0
76	Mellita tenuis Esate Sale	Sample-10-3-56.tif	Quartz	0.6421	0.1168	0.2396	0	0.0007	0	0	0	0	0.0008	0	0	0	0	0	0	0	0	0	0	0	0	0	0	0	0	0	0	0	0	0	0	0	0	0	0	0	0	0
77	Mellita tenuis Esate Sale	Sample-10-3-57.tif	Ilmenite	0.7131	0.0555	0.0008	0	0.0009	0.2055	0.0119	0	0	0	0	0	0	0	0	0	0	0	0	0	0	0	0	0.0123	0	0	0	0	0	0	0	0	0	0	0	0	0	0	0
78	Mellita tenuis Esate Sale	Sample-10-3-58.tif	Quartz	0.2459	0.5901	0.1613	0	0.0006	0	0	0.0014	0	0	0	0	0	0.0005	0	0.0003	0	0	0	0	0	0	0	0	0	0	0	0	0	0	0	0	0	0	0	0	0	0	0
79	Mellita tenuis Esate Sale	Sample-10-3-59.tif	Zircon	0.422	0.4752	0.053	0	0.0007	0.0004	0	0.0484	0	0	0	0	0	0	0	0.0003	0	0	0	0	0	0	0	0	0	0	0	0	0	0	0	0	0	0	0	0	0	0	0
80	Mellita tenuis Esate Sale	Sample-10-3-60.tif	Amphibole	0.5826	0.2783	0.0585	0.0126	0.0452	0.005	0.0061	0.0037	0	0.0074	0	0.0004	0	0	0	0.0003	0	0	0	0	0	0	0	0	0	0	0	0	0	0	0	0	0	0	0	0	0	0	0
81	Mellita tenuis Esate Sale	Sample-10-3-61.tif	Rutile	0.6758	0.0526	0.0069	0	0.0009	0.2638	0	0	0	0	0	0	0	0	0	0	0	0	0	0	0	0	0	0	0	0	0	0	0	0	0	0	0	0	0	0	0	0	0
82	Mellita tenuis Esate Sale	Sample-10-3-62.tif	Zircon	0.6612	0.2519	0.0403	0	0.0007	0	0	0.0447	0	0.0008	0	0	0	0	0	0.0003	0	0	0	0	0	0	0	0	0	0	0	0	0	0	0	0	0	0	0	0	0	0	0
83	Mellita tenuis Gulf Shores	Sample-11-1-63.tif	Quartz	0.6578	0.2717	0.067	0	0.0006	0	0	0	0	0.0007	0	0	0	0	0	0.0022	0	0	0	0	0	0	0	0	0	0	0	0	0	0	0	0	0	0	0	0	0	0	0
84	Mellita tenuis Gulf Shores	Sample-11-2-64.tif	Quartz	0.6952	0.2089	0.0933	0	0	0	0	0	0	0.0007	0	0	0	0	0	0.0003	0	0	0	0	0	0	0	0	0	0	0	0	0	0	0	0	0	0.0015	0	0	0	0	0
85	Mellita tenuis Gulf Shores	Sample-11-2-65.tif	Quartz	0.5633	0.408	0.0272	0	0.0005	0	0	0	0	0.0006	0	0	0	0	0	0.0003	0	0	0	0	0	0	0	0	0	0	0	0	0	0	0	0	0	0	0	0	0	0	0
86	Mellita tenuis Gulf Shores	Sample-11-3-66.tif	Apatite	0.5279	0.3133	0.0012	0	0.0006	0	0	0	0	0.0007	0	0.0483	0	0.0473	0	0.0003	0	0	0	0	0	0	0	0	0	0	0	0	0.0603	0	0	0	0	0	0	0	0	0	0
87	Mellita tenuis Gulf Shores	Sample-11-3-67.tif	Apatite	0.6192	0.1598	0	0	0	0	0	0	0	0	0	0.0771	0	0.0661	0	0.0003	0	0	0	0	0	0	0	0	0	0	0	0	0.0764	0.0011	0	0	0	0	0	0	0	0	0
88	Mellita tenuis Gulf Shores	Sample-11-3-68.tif	Apatite	0.6108	0.2021	0	0	0	0	0	0	0	0.0008	0	0.0509	0	0.0518	0	0	0	0	0	0	0	0	0	0	0	0	0	0	0.0836	0	0	0	0	0	0	0	0	0	0
89	Mellita tenuis Gulf Shores	Sample-11-4-69.tif	Feldspar	0.6515	0.2123	0.0632	0.0007	0.0472	0	0	0	0	0.0182	0	0.0067	0	0	0	0.0003	0	0	0	0	0	0	0	0	0	0	0	0	0	0	0	0	0	0	0	0	0	0	0
90	Mellita tenuis Gulf Shores	Sample-11-4-70.tif	Unknown	0.2171	0.7517	0.0095	0	0	0	0	0	0	0	0	0.0003	0	0.0023	0.0004	0.0184	0	0	0	0	0	0	0	0	0	0	0	0	0	0.0003	0	0	0	0	0	0	0	0	0
91	Mellita tenuis Gulf Shores	Sample-11-4-71.tif	Lithic	0.4664	0.3161	0.1369	0.0007	0.0007	0	0	0	0.0014	0.0124	0	0.0258	0.0305	0.0006	0.008	0.0006	0	0	0	0	0	0	0	0	0	0	0	0	0	0	0	0	0	0	0	0	0	0	0
92	Mellita tenuis Gulf Shores	Sample-11-4-72.tif	Lithic	0.5728	0.284	0.0765	0.0007	0.0006	0	0	0	0	0.0432	0	0.0004	0	0	0.0219	0	0	0	0	0	0	0	0	0	0	0	0	0	0	0	0	0	0	0	0	0	0	0	0
93	Mellita tenuis Gulf Shores	Sample-11-5-73.tif	Quartz	0.4599	0.4801	0.0436	0.0006	0.0006	0	0	0	0	0.0097	0	0	0	0	0.0046	0.0003	0	0	0	0	0	0	0	0	0	0	0	0	0	0	0	0	0	0.0004	0.0002	0	0	0	0
94	Mellita tenuis Gulf Shores	Sample-11-5-74.tif	Unknown	0.2056	0.7709	0.0029	0	0	0	0	0	0	0	0	0.0003	0	0.0018	0.0004	0.0181	0	0	0	0	0	0	0	0	0	0	0	0	0	0	0	0	0	0	0	0	0	0	0
95	Mellita tenuis Gulf Shores	Sample-11-5-75.tif	Quartz	0.5304	0.4248	0.0406	0.0006	0.0006	0	0	0	0	0.0007	0	0	0	0	0.0004	0.0003	0	0.0016	0	0	0	0	0	0	0	0.0001	0	0	0	0	0	0	0	0	0.0001	0	0	0	0
96	Mellita tenuis Gulf Shores	Sample-11-5-76.tif	Quartz	0.3877	0.5511	0.0531	0	0.0005	0	0	0	0	0	0	0.0004	0	0.0033	0.0008	0.003	0	0	0	0	0	0	0	0	0	0	0	0	0	0	0	0	0	0	0	0	0	0	0
97	Mellita tenuis Gulf Shores	Sample-11-5-77.tif	Quartz	0.295	0.5584	0.0064	0.0006	0.0056	0	0	0	0.0004	0.0072	0.1206	0.0003	0.0004	0.0004	0.0043	0.0002	0	0	0	0	0	0	0	0	0	0	0	0	0	0	0	0	0	0	0	0	0	0	0
98	Mellita tenuis Gulf Shores	Sample-11-6-78.tif	Halite	0.2232	0.5632	0.0304	0.0007	0.0006	0	0	0	0.0004	0.0394	0	0.0061	0.0071	0	0.1222	0.0045	0	0	0	0	0	0	0	0	0	0	0	0	0	0	0	0	0	0	0	0.0005	0.0019	0	0
99	Mellita tenuis Gulf Shores	Sample-11-6-79.tif	Lithic	0.2662	0.6014	0.0058	0.0006	0.0005	0	0	0	0.0004	0.0101	0.1066	0.0003	0.0004	0.0004	0.0069	0.0002	0	0	0	0	0	0	0	0	0	0	0	0	0	0	0	0	0	0	0	0	0	0	0
100	Mellita tenuis Gulf Shores	Sample-11-6-80.tif	Halite	0.2321	0.6261	0.0159	0.0006	0.0005	0	0	0	0.0004	0.0131	0.074	0.0029	0.0004	0.0005	0.0332	0.0002	0	0	0	0	0	0	0	0	0	0	0	0	0	0	0	0	0	0	0	0	0	0	0
101	Echinarachnius parma 5/2020	SampleA1-01-001.tif	Garnet	0.5179	0.3959	0.0509	0.0228	0.012	0	0.0003	0	0.0004	0	0	0	0	0	0	0	0	0	0	0	0	0	0	0	0	0	0	0	0	0	0	0	0	0	0	0	0	0	0
102	Echinarachnius parma 5/2020	SampleA1-01-002.tif	Zircon	0.4195	0.5064	0.0423	0.0007	0.0078	0	0.0003	0.0218	0.0004	0	0	0	0	0.0005	0	0.0003	0	0	0	0	0	0	0	0	0	0	0	0	0	0	0	0	0	0	0	0	0	0	0
103	Echinarachnius parma 5/2020	SampleA1-01-003.tif	Garnet	0.4224	0.5194	0.0296	0.0042	0.0227	0	0	0	0.0004	0	0	0	0.0005	0.0005	0.0004	0	0	0	0	0	0	0	0	0	0	0	0	0	0	0	0	0	0	0	0	0	0	0	0
104	Echinarachnius parma 5/2020	SampleA1-01-004.tif	Garnet	0.5042	0.4057	0.0489	0.0197	0.0143	0	0.0003	0	0.0004	0.0007	0	0.0058	0	0	0	0	0	0	0	0	0	0	0	0	0	0	0	0	0	0	0	0	0	0	0	0	0	0	0
105	Echinarachnius parma 5/2020	SampleA1-01-005.tif	Unknown	0.2343	0.7492	0.0085	0.0005	0.0064	0	0.0002	0	0.0003	0.0006	0	0	0	0	0	0	0	0	0	0	0	0	0	0	0	0	0	0	0	0	0	0	0	0	0	0	0	0	0
106	Echinarachnius parma 5/2020	SampleA1-01-006.tif	Unknown	0.1964	0.7922	0.0051	0.0005	0.0029	0	0.0002	0	0.0003	0	0	0.0003	0.0016	0.0004	0	0	0	0	0	0	0	0	0	0	0	0	0	0	0	0	0	0	0	0	0	0	0	0	0
107	Echinarachnius parma 5/2020	SampleA1-01-007.tif	Feldspar	0.2207	0.6649	0.0331	0.0024	0.0733	0.0003	0.0048	0	0.0004	0	0	0	0	0	0	0	0	0	0	0	0	0	0	0	0	0	0	0	0	0	0	0	0	0	0	0	0	0	0
108	Echinarachnius parma 5/2020	SampleA1-02-008.tif	Ilmenite	0.409	0.3775	0.007	0	0.0032	0.0978	0.1016	0	0.0006	0	0	0	0.0007	0	0.0006	0	0.002	0	0	0	0	0	0	0	0	0	0	0	0	0	0	0	0	0	0	0	0	0	0
109	Echinarachnius parma 5/2020	SampleA1-02-009.tif	Amphibole	0.3737	0.4828	0.0192	0.0038	0.0124	0.0151	0.0882	0	0.0024	0	0	0.0005	0.0006	0.0006	0.0005	0	0	0	0	0	0.0004	0	0	0	0	0	0	0	0	0	0	0	0	0	0	0	0	0	0
110	Echinarachnius parma 5/2020	SampleA1-02-010.tif	Amphibole	0.2593	0.6304	0.0154	0.0007	0.0086	0.0038	0.052	0	0.0009	0.0007	0	0.0274	0	0.0005	0	0.0003	0	0	0	0	0	0	0	0	0	0	0	0	0	0	0	0	0	0	0	0	0	0	0
111	Echinarachnius parma 5/2020	SampleA1-02-011.tif	Amphibole	0.4651	0.3432	0.081	0.0216	0.0254	0.0023	0.0317	0	0.0051	0.0039	0	0.0194	0.0006	0	0.0005	0	0.0003	0	0	0	0	0	0	0	0	0	0	0	0	0	0	0	0	0	0	0	0	0	0
112	Echinarachnius parma 5/2020	SampleA1-02-012.tif	Ilmenite	0.4454	0.3937	0.0064	0	0.0044	0.0812	0.0622	0	0.0005	0	0	0	0.0006	0	0.0006	0	0.0051	0	0	0	0	0	0	0	0	0	0	0	0	0	0	0	0	0	0	0	0	0	0
113	Echinarachnius parma 5/2020	SampleA1-02-013.tif	Magnetite	0.5901	0.0981	0.001	0	0	0.1541	0.1567	0	0	0	0	0	0	0	0	0	0	0	0	0	0	0	0	0	0	0	0	0	0	0	0	0	0	0	0	0	0	0	0
114	Echinarachnius parma 5/2020	SampleA1-02-014.tif	Ilmenite	0.2824	0.4446	0.0051	0.001	0.0036	0.132	0.1167	0	0.0006	0	0	0.0006	0	0.0008	0	0.0004	0.0044	0	0	0.004	0.0038	0	0	0	0	0	0	0	0	0	0	0	0	0	0	0	0	0	0
115	Echinarachnius parma 5/2020	SampleA1-02-015.tif	Unknown	0.5587	0.2168	0.0566	0.0093	0.0329	0.059	0.0592	0	0.0069	0	0	0	0.0006	0	0	0	0	0	0	0	0	0	0	0	0	0	0	0	0	0	0	0	0	0	0	0	0	0	0
116	Echinarachnius parma 5/2020	SampleA1-02-016.tif	Amphibole	0.2285	0.6707	0.029	0.0006	0.0145	0.0043	0.0287	0	0.0052	0	0	0.0172	0.0005	0.0005	0	0.0003	0	0	0	0	0	0	0	0	0	0	0	0	0	0	0	0	0	0	0	0	0	0	0
117	Echinarachnius parma 5/2020	SampleA1-03-017.tif	Sphere	0.3714	0.4276	0.0831	0.0034	0.0429	0.0014	0.0133	0	0.0072	0.0022	0.0437	0.0012	0.001	0.0011	0.0005	0	0	0	0	0	0	0	0	0	0	0	0	0	0	0	0	0	0	0	0	0	0	0	0
118	Echinarachnius parma 5/2020	SampleA1-03-018.tif	Garnet	0.3358	0.4039	0.0146	0.0019	0.0093	0.1289	0.0938	0	0.0018	0	0	0.0063	0	0	0	0.0012	0.0025	0	0	0	0	0	0	0	0	0	0	0	0	0	0	0	0	0	0	0	0	0	0
119	Echinarachnius parma 5/2020	SampleA1-03-019.tif	Ilmenite	0.5438	0.1339	0.0695	0.0031	0.0128	0.1146	0.101	0	0.0019	0	0	0.0185	0	0	0	0	0	0.001	0	0	0	0	0	0	0	0	0	0	0	0	0	0	0	0	0	0	0	0	0
120	Echinarachnius parma 5/2020	SampleA1-03-020.tif	Ilmenite	0.3768	0.313	0.0229	0.0031	0.0156	0.1372	0.1001	0	0.0032	0	0	0	0.0015	0	0.0007	0.0004	0.0257	0	0	0	0	0	0	0	0	0	0	0	0	0	0	0	0	0	0	0	0	0	0
121	Echinarachnius parma 5/2020	SampleA1-03-021.tif	Ilmenite	0.4227	0.3259	0.0188	0	0.0077	0.1085	0.1084	0	0.0012	0	0	0.0011	0.0007	0.0007	0	0	0.0042	0	0	0	0	0	0	0	0	0	0	0	0	0	0	0	0	0	0	0	0	0	0
122	Echinarachnius parma 5/2020	SampleA1-03-022.tif	Rutile	0.4603	0.1348	0.0134	0.0036	0.0053	0.3111	0.0098	0.0022	0.0007	0	0	0.005	0	0	0	0	0	0	0.0537	0	0	0	0	0	0	0	0	0	0	0	0	0	0	0	0	0	0	0	0
123	Echinarachnius parma 5/2020	SampleA1-03-023.tif	Ilmenite	0.5977	0.1114	0.0055	0	0.0038	0.1412	0.1175	0	0	0	0	0	0	0	0	0	0.0229	0	0	0	0	0	0	0	0	0	0	0	0	0	0	0	0	0	0	0	0	0	0
124	Echinarachnius parma 5/2020	SampleA2-01-024.tif	Sphere	0.5717	0.3359	0.0482	0	0.0379	0	0.0006	0	0.0016	0.0041	0	0	0	0	0	0	0	0	0	0	0	0	0	0	0	0	0	0	0	0	0	0	0	0	0	0	0	0	0
125	Echinarachnius parma 5/2020	SampleA2-01-025.tif	Zircon	0.6297	0.298	0.037	0	0.0046	0	0	0.0305	0	0	0	0	0	0	0	0.0003	0	0	0	0	0	0	0	0	0	0	0	0	0	0	0	0	0	0	0	0	0	0	0
126	Echinarachnius parma 5/2020	SampleA2-01-026.tif	Amphibole	0.5499	0.205	0.1151	0.0452	0.0259	0.002	0.0231	0	0.0034	0.0049	0	0.0255	0	0	0	0	0	0	0	0	0	0	0	0	0	0	0	0	0	0	0	0	0	0	0	0	0	0	0
127	Echinarachnius parma 5/2020	SampleA2-01-027.tif	Amphibole	0.4875	0.3667	0.0688	0.024	0.0222	0.0014	0.0078	0	0.0034	0.0022	0	0.015	0	0.0005	0	0.0006	0	0	0	0	0	0	0	0	0	0	0	0	0	0	0	0	0	0	0	0	0	0	0
128	Echinarachnius parma 5/2020	SampleA2-01-028.tif	Sphere	0.3861	0.5186	0.0443	0.0019	0.0307	0.0029	0.0061	0	0.0031	0.002	0	0.0008	0.0005	0.001	0	0.0021	0	0	0	0	0	0	0	0	0	0	0	0	0	0	0	0	0	0	0	0	0	0	0
129	Echinarachnius parma 5/2020	SampleA2-02-029.tif	Sphere	0.4704	0.472	0.0258	0.0012	0.0225	0	0.0005	0	0.0011	0.0051	0	0	0.0005	0.0005	0.0004	0	0	0	0	0	0	0	0	0	0	0	0	0	0	0	0	0	0	0	0	0	0	0	0
130	Echinarachnius parma 5/2020	SampleA2-02-030.tif	Sphere	0.1552	0.8434	0	0	0.0005	0	0.0009	0	0	0	0	0	0	0	0	0	0	0	0	0	0	0	0	0	0	0	0	0	0	0	0	0	0	0	0	0	0	0	0
131	Echinarachnius parma 5/2020	SampleA2-02-031.tif	Zircon	0.5	0.3836	0.0378	0.0046	0.0182	0	0.0009	0.0092	0.002	0.0014	0.042	0	0	0	0	0.0003	0	0	0	0	0	0	0	0	0	0	0	0	0	0	0	0	0	0	0	0	0	0	0
132	Echinarachnius parma 5/2020	SampleA2-02-032.tif	Ilmenite	0.2639	0.5252	0.0161	0.0017	0.0114	0.0894	0.0805	0	0.0021	0.0009	0	0.0036	0	0.0007	0	0.0014	0.003	0	0	0	0	0	0	0	0	0	0	0	0	0	0	0	0	0	0	0	0	0	0
133	Echinarachnius parma 5/2020	SampleA2-02-033.tif	Ilmenite	0.4118	0.2673	0.0416	0.0051	0.0258	0.11	0.1256	0	0.0064	0	0	0	0.0008	0	0	0	0.0032	0	0	0.0025	0	0	0	0	0	0	0	0	0	0	0	0	0	0	0	0	0	0	0
134	Echinarachnius parma 5/2020	SampleA2-02-034.tif	Ilmenite	0.3882	0.3345	0.0399	0.0055	0.0174	0.0983	0.0772	0	0.0023	0.0078	0	0.019	0.0014	0	0.0032	0	0.0053	0	0	0	0	0	0	0	0	0	0	0	0	0	0	0	0	0	0	0	0	0	0
135	Echinarachnius parma 5/2020	SampleA2-02-035.tif	Ilmenite	0.3278	0.5279	0.0067	0	0.0042	0.0663	0.0653	0	0.0005	0	0	0	0	0	0	0	0.0014	0	0	0	0	0	0	0	0	0	0	0	0	0	0	0	0	0	0	0	0	0	0
136	Echinarachnius parma 5/2020	SampleA2-03-036.tif	Ilmenite	0.4684	0.3493	0.0118	0	0.0061	0.0746	0.0796	0	0.0011	0	0	0.0036	0.0013	0	0.0006	0	0.0038	0	0	0	0	0	0	0	0	0	0	0	0	0	0	0	0	0	0	0	0	0	0
137	Echinarachnius parma 5/2020	SampleA2-03-037.tif	Kyanite	0.3904	0.5634	0.0285	0.0024	0.0116	0	0	0	0.0015	0	0	0	0.0013	0.0005	0.0004	0	0	0	0	0	0	0	0	0	0	0	0	0	0	0	0	0	0	0	0	0	0	0	0
138	Echinarachnius parma 5/2020	SampleA2-03-038.tif	Sphere	0.6314	0.2585	0.0572	0.002	0.0439	0	0.0003	0	0.0017	0.0049	0	0	0	0	0	0	0	0	0	0	0	0	0	0	0	0	0	0	0	0	0	0	0	0	0	0	0	0	0
139	Echinarachnius parma 5/2020	SampleA2-03-039.tif	Garnet	0.58	0.2592	0.0835	0.0119	0.0497	0.0004	0.0034	0	0.0074	0.0022	0	0.0008	0.0005	0.0011	0	0	0	0	0	0	0	0	0	0	0	0	0	0	0	0	0	0	0	0	0	0	0	0	0
140	Echinarachnius parma 5/2020	SampleA2-03-040.tif	Garnet	0.6074	0.248	0.0951	0.0055	0.0374	0	0.0012	0	0.003	0	0	0.0008	0	0.0005	0.0005	0	0	0.0005	0	0	0	0	0	0	0	0	0	0	0	0	0	0	0	0	0	0	0	0	0
141	Echinarachnius parma 5/2020	SampleA2-03-041.tif	Feldspar	0.4669	0.3829	0.0835	0.0075	0.038	0.0007	0.0062	0	0.0085	0.0014	0	0.0016	0	0.0011	0.0005	0	0.0012	0	0	0	0	0	0	0	0	0	0	0	0	0	0	0	0	0	0	0	0	0	0
142	Echinarachnius parma 5/2020	SampleA2-03-042.tif	Magnetite	0.5171	0.1505	0.0373	0.0065	0.0281	0.041	0.2149	0	0.0047	0	0	0	0	0	0	0	0	0	0	0	0	0	0	0	0	0	0	0	0	0	0	0	0	0	0	0	0	0	0
143	Echinarachnius parma 5/2020	SampleA2-03-043.tif	Organic	0.2509	0.7383	0.0028	0.0005	0.0029	0	0	0	0	0.0011	0	0.0016	0.0008	0	0.0007	0.0002	0	0	0	0	0	0	0	0	0	0	0	0	0	0	0	0	0	0	0	0	0	0	0
144	Echinarachnius parma 5/2020	SampleA2-04-045.tif	Sphere	0.6083	0.2922	0.0524	0.0007	0.0427	0.0003	0.0003	0	0.0008	0.0014	0	0.0004	0	0.0005	0	0	0	0	0	0	0	0	0	0	0	0	0	0	0	0	0	0	0	0	0	0	0	0	0
145	Echinarachnius parma 5/2020	SampleA2-04-046.tif	Garnet	0.4851	0.3019	0.1005	0.0153	0.0664	0.0004	0.0108	0	0.0164	0.0008	0	0.0004	0.0006	0.0006	0.0005	0.0003	0	0	0	0	0	0	0	0	0	0	0	0	0	0	0	0	0	0	0	0	0	0	0
146	Echinarachnius parma 5/2020	SampleA2-04-047.tif	Amphibole	0.5199	0.2289	0.1168	0.0424	0.029	0.0028	0.0267	0	0.0039	0.0041	0	0.0252	0	0	0	0.0003	0	0	0	0	0	0	0	0	0	0	0	0	0	0	0	0	0	0	0	0	0	0	0
147	Echinarachnius parma 5/2020	SampleA2-04-048.tif	Ilmenite	0.4343	0.3239	0.1083	0.026	0.0262	0.004	0.0449	0	0.0024	0.005	0	0.0243	0	0	0.0005	0	0	0	0	0	0	0	0	0	0	0	0	0	0	0	0	0	0	0	0	0	0	0	0
148	Echinarachnius parma 5/2020	SampleA2-04-049.tif	Ilmenite	0.1979	0.2883	0.0163	0	0.0012	0.2678	0.2129	0	0	0	0	0	0.001	0	0.0009	0.0006	0.0131	0	0	0	0	0	0	0	0	0	0	0	0	0	0	0	0	0	0	0	0	0	0
149	Echinarachnius parma 5/2020	SampleA2-04-050.tif	Garnet	0.2296	0.7357	0.0102	0	0.0161	0	0.0002	0	0.0045	0	0	0	0	0.0004	0	0.0032	0	0	0	0	0	0	0	0	0	0	0	0	0	0	0	0	0	0	0	0	0	0	0
150	Echinarachnius parma 5/2020	SampleA2-04-051.tif	Garnet	0.5887	0.2489	0.0858	0.0098	0.0559	0	0.0003	0	0.0082	0.0007	0	0	0.0005	0.0005	0.0005	0	0	0	0	0	0	0	0	0	0	0	0	0	0	0	0	0	0	0	0	0	0	0	0
151	Echinarachnius parma 5/2020	SampleA2-04-052.tif	Organic	0.2495	0.7479	0.0005	0	0.0005	0	0	0	0	0.0006	0	0.0003	0.0004	0	0.0004	0	0	0	0	0	0	0	0	0	0	0	0	0	0	0	0	0	0	0	0	0	0	0	0
152	Echinarachnius parma EA002	SampleA3-01-053.tif	Sphere	0.4464	0.2466	0.1067	0.0008	0.1469	0.0288	0.0117	0	0.004	0.0009	0	0.0059	0	0	0	0	0	0	0	0.0013	0	0	0	0	0	0	0	0	0	0	0	0	0	0	0	0	0	0	0
153	Echinarachnius parma EA002	SampleA3-01-054.tif	Amphibole	0.5067	0.2336	0.1205	0.0093	0.0585	0.0004	0.0155	0	0.0101	0.0221	0	0.0216	0.0006	0.0006	0.0005	0	0	0	0	0	0	0	0	0	0	0	0	0	0	0	0	0	0	0	0	0	0	0	0
154	Echinarachnius parma EA002	SampleA3-01-055.tif	Magnetite	0.281	0.487	0.056	0.0008	0.028	0.0068	0.1124	0	0.0214	0.0009	0	0.0036	0	0	0	0.0021	0	0	0	0	0	0	0	0	0	0	0	0	0	0	0	0	0	0	0	0	0	0	0
155	Echinarachnius parma EA002	SampleA3-01-056.tif	Magnetite	0.2616	0.62	0.0208	0.0007	0.0096	0.0065	0.0685	0.0021	0.0088	0.0007	0	0.0004	0	0	0	0.0003	0	0	0	0	0	0	0	0	0	0	0	0	0	0	0	0	0	0	0	0	0	0	0
156	Echinarachnius parma EA002	SampleA3-01-057.tif	Feldspar	0.6018	0.2595	0.0497	0.0007	0.0686	0.0004	0.0045	0.0015	0.0052	0.0066	0	0.0004	0	0.0005	0	0.0003	0.0003	0	0	0	0	0	0	0	0	0	0	0	0	0	0	0	0	0	0	0	0	0	0
157	Echinarachnius parma EA002	SampleA3-01-058.tif	Amphibole	0.4145	0.4755	0.0192	0.0028	0.0118	0.0116	0.0226	0.0013	0.009	0	0	0.0311	0	0.0005	0	0	0	0	0	0	0	0	0	0	0	0	0	0	0	0	0	0	0	0	0	0	0	0	0
158	Echinarachnius parma EA002	SampleA3-01-059.tif	Quartz	0.2508	0.503	0.1753	0.0014	0.0052	0	0	0	0	0.0077	0	0.0557	0	0.0006	0	0.0003	0	0	0	0	0	0	0	0	0	0	0	0	0	0	0	0	0	0	0	0	0	0	0
159	Echinarachnius parma EA002	SampleA3-02-060.tif	Sphere	0.5343	0.192	0.1157	0.0008	0.0934	0.0049	0.0388	0	0.0045	0.0086	0	0.0064	0	0.0006	0	0	0	0	0	0	0	0	0	0	0	0	0	0	0	0	0	0	0	0	0	0	0	0	0
160	Echinarachnius parma EA002	SampleA3-02-061.tif	Sphere	0.5745	0.211	0.0945	0.0007	0.1109	0.0004	0.0003	0	0.0063	0.0008	0	0	0	0.0006	0	0	0	0	0	0	0	0	0	0	0	0	0	0	0	0	0	0	0	0	0	0	0	0	0
161	Echinarachnius parma EA002	SampleA3-02-062.tif	Sphere	0.644	0.1079	0.1075	0	0.121	0.0094	0.003	0	0.0053	0.0008	0	0.0005	0	0.0006	0	0	0	0	0	0	0	0	0	0	0	0	0	0	0	0	0	0	0	0	0	0	0	0	0
162	Echinarachnius parma EA002	SampleA3-02-063.tif	Sphere	0.7238	0.0678	0.0977	0.0007	0.0863	0.0004	0.0003	0	0.0005	0.022	0	0.0005	0	0	0	0	0	0	0	0	0	0	0	0	0	0	0	0	0	0	0	0	0	0	0	0	0	0	0
163	Echinarachnius parma EA002	SampleA3-02-064.tif	Feldspar	0.6324	0.1034	0.0756	0	0.1553	0	0.0003	0	0	0.0123	0	0.0206	0	0	0	0	0	0	0	0	0	0	0	0	0	0	0	0	0	0	0	0	0	0	0	0	0	0	0
164	Echinarachnius parma EA002	SampleA3-02-065.tif	Zircon	0.4595	0.2854	0.0329	0	0.0006	0	0	0.0328	0	0	0	0	0	0.0005	0	0.0003	0	0	0	0	0	0.1881	0	0	0	0	0	0	0	0	0	0	0	0	0	0	0	0	0
165	Echinarachnius parma EA002	SampleA3-02-066.tif	Unknown	0.5958	0.3831	0.0042	0	0.0158	0	0.0003	0	0.0004	0	0	0	0	0.0005	0	0	0	0	0	0	0	0	0	0	0	0	0	0	0	0	0	0	0	0	0	0	0	0	0
166	Echinarachnius parma EA002	SampleA3-03-067.tif	Sphere	0.6113	0.1673	0.1078	0.0008	0.0939	0.0084	0.0046	0	0.0047	0.0008	0	0.0005	0	0	0	0	0	0	0	0	0	0	0	0	0	0	0	0	0	0	0	0	0	0	0	0	0	0	0
167	Echinarachnius parma EA002	SampleA3-03-068.tif	Sphere	0.3979	0.4186	0.0543	0.0008	0.0497	0.005	0.0623	0	0.0028	0.0032	0	0.005	0	0	0	0.0003	0	0	0	0	0	0	0	0	0	0	0	0	0	0	0	0	0	0	0	0	0	0	0
168	Echinarachnius parma EA002	SampleA3-03-069.tif	Sphere	0.6504	0.1957	0.0842	0.0007	0.0476	0.0039	0.0003	0	0.0004	0.0112	0	0.0047	0	0.0006	0	0.0003	0	0	0	0	0	0	0	0	0	0	0	0	0	0	0	0	0	0	0	0	0	0	0
169	Echinarachnius parma EA002	SampleA3-03-070.tif	Amphibole	0.5308	0.1879	0.1063	0.0033	0.07	0	0.0357	0	0.0036	0.0009	0	0.0603	0.0006	0	0.0006	0	0	0	0	0	0	0	0	0	0	0	0	0	0	0	0	0	0	0	0	0	0	0	0
170	Echinarachnius parma EA002	SampleA3-03-071.tif	Feldspar	0.5241	0.27	0.0748	0.0249	0.0738	0.0004	0.0204	0	0.0005	0.0085	0	0.0027	0	0	0	0	0	0	0	0	0	0	0	0	0	0	0	0	0	0	0	0	0	0	0	0	0	0	0
171	Echinarachnius parma EA002	SampleA3-05-072.tif	Sphere	0.5033	0.3479	0.0611	0.0007	0.077	0.0059	0.0018	0	0.0004	0.0007	0	0.0004	0	0.0005	0	0.0003	0	0	0	0	0	0	0	0	0	0	0	0	0	0	0	0	0	0	0	0	0	0	0
172	Echinarachnius parma EA002	SampleA3-05-073.tif	Sphere	0.5269	0.2899	0.0979	0.0007	0.0506	0.0015	0.0235	0	0.0023	0.0031	0	0.0031	0	0.0006	0	0	0	0	0	0	0	0	0	0	0	0	0	0	0	0	0	0	0	0	0	0	0	0	0
173	Echinarachnius parma EA002	SampleA3-05-074.tif	Sphere	0.4692	0.428	0.0565	0.0006	0.0297	0.0033	0.0039	0	0.0004	0.0048	0	0.0031	0	0.0005	0	0	0	0	0	0	0	0	0	0	0	0	0	0	0	0	0	0	0	0	0	0	0	0	0
174	Echinarachnius parma EA002	SampleA3-05-075.tif	Amphibole	0.5388	0.239	0.0885	0.0261	0.0773	0.0004	0.0202	0	0.0005	0.0055	0	0.0032	0	0.0006	0	0	0	0	0	0	0	0	0	0	0	0	0	0	0	0	0	0	0	0	0	0	0	0	0
175	Encope michelini Ft Walton	SampleA4-01-077.tif	Feldspar	0.6474	0.2609	0.0516	0	0.0006	0.0163	0	0	0	0	0	0.0228	0	0	0	0.0003	0	0	0	0	0	0	0	0	0	0	0	0	0	0	0	0	0	0	0	0	0	0	0
176	Encope michelini Ft Walton	SampleA4-01-078.tif	Zircon	0.7583	0.1197	0.0615	0	0	0	0	0.0602	0	0	0	0	0	0	0	0.0004	0	0	0	0	0	0	0	0	0	0	0	0	0	0	0	0	0	0	0	0	0	0	0
177	Encope michelini Ft Walton	SampleA4-01-079.tif	Ilmenite	0.3956	0.1707	0.0054	0	0	0.2247	0.1934	0	0	0	0	0.0046	0	0	0	0	0.0056	0	0	0	0	0	0	0	0	0	0	0	0	0	0	0	0	0	0	0	0	0	0
178	Encope michelini Ft Walton	SampleA4-01-080.tif	Ilmenite	0.2307	0.5392	0.0015	0.0009	0.0008	0.1469	0.0771	0	0	0	0	0	0.0007	0.0007	0	0.0015	0	0	0	0	0	0	0	0	0	0	0	0	0	0	0	0	0	0	0	0	0	0	0
179	Encope michelini Ft Walton	SampleA4-01-081.tif	Zircon	0.3296	0.6115	0.03	0.0007	0.0006	0.0003	0.0003	0.0251	0	0.0007	0	0.0004	0	0.0005	0	0.0003	0	0	0	0	0	0	0.0002	0	0	0	0	0	0	0	0	0	0	0	0	0	0	0	0
180	Encope michelini Ft Walton	SampleA4-01-082.tif	Ilmenite	0.6721	0.0831	0	0	0	0.1397	0.1016	0	0	0	0	0	0	0	0	0	0.0035	0	0	0	0	0	0	0	0	0	0	0	0	0	0	0	0	0	0	0	0	0	0
181	Encope michelini Ft Walton	SampleA4-01-083.tif	Garnet	0.6667	0.242	0.0303	0.0119	0.0404	0	0.0003	0	0	0.0077	0	0	0	0.0005	0	0.0003	0	0	0	0	0	0	0	0	0	0	0	0	0	0	0	0	0	0	0	0	0	0	0
182	Encope michelini Ft Walton	SampleA4-01-084.tif	Ilmenite	0.3318	0.1649	0.0023	0.0014	0.0012	0.2864	0.2045	0.0004	0	0	0	0	0	0	0	0.0006	0.0066	0	0	0	0	0	0	0	0	0	0	0	0	0	0	0	0	0	0	0	0	0	0
183	Mellita tenuis Estate Sale	SampleA5-01-085.tif	Garnet	0.5268	0.3898	0.0324	0.0089	0.0354	0.0003	0.0019	0	0	0.004	0	0.0004	0	0	0	0	0	0	0	0	0	0	0	0	0	0	0	0	0	0	0	0	0	0	0	0	0	0	0
184	Mellita tenuis Estate Sale	SampleA5-01-086.tif	Rutile	0.3412	0.1075	0.0012	0	0.0012	0.5463	0.0006	0.0004	0	0	0	0	0	0.0011	0	0.0006	0	0	0	0	0	0	0	0	0	0	0	0	0	0	0	0	0	0	0	0	0	0	0
185	Mellita tenuis Estate Sale	SampleA5-01-087.tif	Kyanite	0.5251	0.2325	0.0275	0.0131	0.0354	0	0	0.0002	0	0.0086	0	0.0004	0	0	0	0	0	0	0	0	0	0.1573	0	0	0	0	0	0	0	0	0	0	0	0	0	0	0	0	0
186	Mellita tenuis Estate Sale	SampleA5-01-088.tif	Rutile	0.5358	0.0507	0.001	0	0.0011	0.4111	0	0	0	0	0	0	0	0	0	0	0	0	0	0	0	0	0	0.0003	0	0	0	0	0	0	0	0	0	0	0	0	0	0	0
187	Mellita tenuis Estate Sale	SampleA5-01-089.tif	Zircon	0.4476	0.3148	0.0229	0	0.0006	0	0	0.0218	0	0	0	0	0	0.0005	0	0.0003	0	0	0	0	0	0.1916	0	0	0	0	0	0	0	0	0	0	0	0	0	0	0	0	0
188	Mellita tenuis Estate Sale	SampleA5-01-090.tif	Zircon	0.5358	0.2197	0.0307	0	0.0006	0	0	0.0271	0	0	0	0	0	0	0	0.0003	0	0	0	0	0	0.1858	0	0	0	0	0	0	0	0	0	0	0	0	0	0	0	0	0
189	Mellita tenuis Estate Sale	SampleA5-01-091.tif	Ilmenite	0.2621	0.3695	0.0067	0	0.001	0.3139	0.0412	0.0053	0	0	0	0	0	0	0	0.0005	0	0	0	0	0	0	0	0	0	0	0	0	0	0	0	0	0	0	0	0	0	0	0
190	Mellita tenuis Estate Sale	SampleA5-01-092.tif	Ilmenite	0.7343	0.0693	0.0055	0	0.0008	0.1895	0.0004	0	0	0	0	0	0	0	0	0	0	0	0	0	0	0	0	0.0002	0	0	0	0	0	0	0	0	0	0	0	0	0	0	0
191	Mellita tenuis Estate Sale	SampleA5-02-093.tif	Rutile	0.5177	0.0892	0.001	0	0.001	0.3865	0.004	0	0	0	0	0	0	0	0	0.0005	0	0	0	0	0	0	0	0	0	0	0	0	0	0	0	0	0	0	0	0	0	0	0
192	Mellita tenuis Estate Sale	SampleA5-02-094.tif	Zircon	0.3965	0.5286	0.0371	0	0.008	0.001	0.0009	0.0267	0	0	0	0	0	0	0	0.0011	0	0	0	0	0	0	0	0	0	0	0	0	0	0	0	0	0	0	0	0	0	0	0
193	Mellita tenuis Estate Sale	SampleA5-02-095.tif	Rutile	0.4803	0.297	0.0609	0.0008	0.0237	0.1157	0.0133	0	0.0011	0	0	0.0005	0.0006	0.0007	0	0	0	0	0	0.0035	0.002	0	0	0	0	0	0	0	0	0	0	0	0	0	0	0	0	0	0
194	Mellita tenuis Estate Sale	SampleA5-02-096.tif	Rutile	0.2726	0.2043	0.0011	0	0.0012	0.5198	0	0.0003	0	0	0	0	0	0	0	0.0005	0	0	0	0	0	0	0	0	0	0	0	0	0	0	0	0	0	0	0	0	0	0	0
195	Mellita tenuis Estate Sale	SampleA5-02-097.tif	Zircon	0.4666	0.436	0.047	0	0	0.0004	0	0.05	0	0	0	0	0	0	0	0	0	0	0	0	0	0	0	0	0	0	0	0	0	0	0	0	0	0	0	0	0	0	0
196	Mellita tenuis Estate Sale	SampleA5-02-098.tif	Rutile	0.6552	0.0624	0.0309	0	0.0009	0.2506	0	0	0	0	0	0	0	0	0	0	0	0	0	0	0	0	0	0	0	0	0	0	0	0	0	0	0	0	0	0	0	0	0
197	Mellita tenuis Estate Sale	SampleA5-02-099.tif	Zircon	0.6164	0.2615	0.0595	0	0	0	0	0.0626	0	0	0	0	0	0	0	0	0	0	0	0	0	0	0	0	0	0	0	0	0	0	0	0	0	0	0	0	0	0	0
198	Mellita tenuis Estate Sale	SampleA5-02-100.tif	Zircon	0.5069	0.3578	0.0455	0.0007	0.0126	0	0.0003	0.0183	0.0004	0	0.0536	0	0	0.0011	0	0	0	0	0	0	0	0	0	0	0.0025	0.0002	0	0	0	0	0	0	0	0	0	0	0	0	0
199	Mellita tenuis Estate Sale	SampleA5-02-101.tif	Amphibole	0.5237	0.3926	0.0492	0.0253	0.0085	0	0.0003	0	0.0004	0	0	0	0	0	0	0	0	0	0	0	0	0	0	0	0	0	0	0	0	0	0	0	0	0	0	0	0	0	0
200	Mellita tenuis Estate Sale	SampleA5-02-102.tif	Zircon	0.6658	0.2691	0.0337	0	0.0007	0	0	0.0293	0	0	0	0	0	0.0011	0	0.0003	0	0	0	0	0	0	0	0	0	0	0	0	0	0	0	0	0	0	0	0	0	0	0
201	Mellita tenuis Estate Sale	SampleA5-02-103.tif	Unknown	0.52	0.3849	0.0129	0	0.005	0	0	0.0066	0	0	0.0699	0	0	0.0005	0	0.0003	0	0	0	0	0	0	0	0	0	0	0	0	0	0	0	0	0	0	0	0	0	0	0
202	Mellita tenuis Estate Sale	SampleA5-02-104.tif	Kyanite	0.5124	0.2531	0.0431	0.0065	0.0478	0.0003	0.0056	0	0	0.0068	0	0.0004	0	0	0	0	0	0	0	0	0	0.1239	0	0	0	0	0	0	0	0	0	0	0	0	0	0	0	0	0
203	Mellita tenuis Estate Sale	SampleA5-02-105.tif	Rutile	0.665	0.0847	0	0	0	0.2503	0	0	0	0	0	0	0	0	0	0	0	0	0	0	0	0	0	0	0	0	0	0	0	0	0	0	0	0	0	0	0	0	0
204	Mellita tenuis Estate Sale	SampleA5-02-106.tif	Rutile	0.6094	0.1085	0.0061	0	0.0009	0.2718	0.0004	0	0	0	0	0	0	0	0	0	0	0	0	0	0	0	0	0.0029	0	0	0	0	0	0	0	0	0	0	0	0	0	0	0
205	Mellita tenuis Estate Sale	SampleA5-02-107.tif	Rutile	0.6071	0.1145	0.0017	0	0.0009	0.2719	0.0004	0	0	0	0	0	0	0	0	0	0	0	0	0	0	0	0	0.0034	0	0	0	0	0	0	0	0	0	0	0	0	0	0	0
206	Mellita notabilis Puerta Vallarta	SampleA6-01-111.tif	Quartz	0.6795	0.1498	0.1708	0	0	0	0	0	0	0	0	0	0	0	0	0	0	0	0	0	0	0	0	0	0	0	0	0	0	0	0	0	0	0	0	0	0	0	0
207	Mellita notabilis Puerta Vallarta	SampleA6-01-112.tif	Ilmenite	0.1956	0.6503	0.0054	0	0	0.0822	0.0635	0.0025	0	0	0	0	0	0	0	0.0003	0	0	0	0	0	0	0	0	0	0	0.0002	0	0	0	0	0	0	0	0	0	0	0	0
208	Mellita notabilis Puerta Vallarta	SampleA6-01-113.tif	Ilmenite	0.6475	0.0685	0	0	0	0.1669	0.1133	0	0	0	0	0	0	0	0	0	0.0037	0	0	0	0	0	0	0	0	0	0	0	0	0	0	0	0	0	0	0	0	0	0
209	Mellita notabilis Puerta Vallarta	SampleA6-01-114.tif	Zircon	0.5641	0.278	0.094	0	0.0053	0	0.0004	0.0579	0	0	0	0	0	0	0	0.0003	0	0	0	0	0	0	0	0	0	0	0	0	0	0	0	0	0	0	0	0	0	0	0
210	Mellita notabilis Puerta Vallarta	SampleA6-01-115.tif	Ilmenite	0.1623	0.6609	0.0007	0	0	0.0924	0.0776	0.0011	0	0	0	0	0	0	0	0.0003	0.0047	0	0	0	0	0	0	0	0	0	0	0	0	0	0	0	0	0	0	0	0	0	0
211	Mellita notabilis Puerta Vallarta	SampleA6-01-116.tif	Ilmenite	0.5771	0.0878	0	0	0	0.1586	0.1704	0	0	0	0	0	0	0	0	0	0.0061	0	0	0	0	0	0	0	0	0	0	0	0	0	0	0	0	0	0	0	0	0	0
212	Mellita notabilis Puerta Vallarta	SampleA6-01-117.tif	Ilmenite	0.3443	0.4108	0.0041	0	0.0017	0.0947	0.1406	0	0	0	0	0.0023	0	0.0007	0.0007	0	0	0	0	0	0	0	0	0	0	0	0	0	0	0	0	0	0	0	0	0	0	0	0
213	Mellita notabilis Puerta Vallarta	SampleA6-01-118.tif	Zircon	0.4103	0.381	0.045	0	0	0	0	0.0451	0	0	0	0	0	0	0	0	0	0	0	0	0	0.1186	0	0	0	0	0	0	0	0	0	0	0	0	0	0	0	0	0
214	Mellita notabilis Puerta Vallarta	SampleA6-01-119.tif	Amphibole	0.3586	0.4975	0.0483	0.0007	0.041	0.0003	0.0107	0	0	0	0	0.0425	0	0	0.0005	0	0	0	0	0	0	0	0	0	0	0	0	0	0	0	0	0	0	0	0	0	0	0	0
215	Mellita notabilis Puerta Vallarta	SampleA6-01-120.tif	Ilmenite	0.6702	0.0668	0	0	0	0.1438	0.1051	0	0	0	0	0	0	0	0	0	0.0141	0	0	0	0	0	0	0	0	0	0	0	0	0	0	0	0	0	0	0	0	0	0
216	Mellita notabilis Puerta Vallarta	SampleA6-01-121.tif	Ilmenite	0.5964	0.077	0.001	0	0.001	0.1828	0.1418	0	0	0	0	0	0	0	0	0	0	0	0	0	0	0	0	0	0	0	0	0	0	0	0	0	0	0	0	0	0	0	0
217	Mellita notabilis Puerta Vallarta	SampleA6-01-122.tif	Ilmenite	0.638	0.0707	0	0.0011	0	0.1981	0.0922	0	0	0	0	0	0	0	0	0	0	0	0	0	0	0	0	0	0	0	0	0	0	0	0	0	0	0	0	0	0	0	0
218	Mellita notabilis Puerta Vallarta	SampleA6-01-123.tif	Zircon	0.6646	0.2029	0.0629	0	0.0008	0	0	0.0632	0	0	0	0.0005	0	0.0047	0	0.0004	0	0	0	0	0	0	0	0	0	0	0	0	0	0	0	0	0	0	0	0	0	0	0
219	Mellita notabilis Puerta Vallarta	SampleA6-01-124.tif	Unknown	0.2445	0.7373	0.0024	0.0006	0.001	0	0.0103	0.0007	0	0.0006	0	0.0024	0	0	0	0.0002	0	0	0	0	0	0	0	0	0	0	0	0	0	0	0	0	0	0	0	0	0	0	0
220	Mellita notabilis Puerta Vallarta	SampleA6-01-125.tif	Magnetite	0.4735	0.2398	0.0019	0	0.001	0.0006	0.2834	0	0	0	0	0	0	0	0	0	0	0	0	0	0	0	0	0	0	0	0	0	0	0	0	0	0	0	0	0	0	0	0
221	Mellita notabilis Puerta Vallarta	SampleA6-01-126.tif	Ilmenite	0.6117	0.0771	0	0.0412	0	0.1582	0.1082	0.0037	0	0	0	0	0	0	0	0	0	0	0	0	0	0	0	0	0	0	0	0	0	0	0	0	0	0	0	0	0	0	0
