# Supplementary material for: Selective concentration of iron, titanium, and zirconium substrate minerals within Gregory’s diverticulum, an organ unique to derived sand dollars (Echinoidea: Scutelliformes)
Source: PeerJ. 2024 Apr 5;12:e17178. doi: 10.7717/peerj.17178 (PMC11000648; doi:10.7717/peerj.17178)
Supplement: Supplemental Information 2 — All data are in volume percent. [file peerj-12-17178-s002.xlsx]

## Sheet: Sheet1
Sample	Type	Max Size	Min Size	Quartz	Muscovite	Albite	Microcline	Anorthite	Augite	Hornblende	Clinochlore	Magnetite	Hematite	Ilmenite	Rutile	Zircon	Halite	Dolomite	Calcite	Gypsum	Analcime	Heulandite		Quartz	Feldspar	Mica	Hornblende	Chlorite	Other	Total
LZ1	Sieve	0.125	0.09	41.65	7.27	28.8	11	0	0	4.55	6.74	0	0	0	0	0	0	0	0	0	0	0		41.65	39.8	7.27	4.55	6.74	0	100.01
LZ2	Sieve	0.09	0.063	51.06	5.27	19.54	6.9	0	0	8.01	6.45	2.26	0	0	0	0	0.5	0	0	0	0	0		51.06	26.44	5.27	8.01	6.45	2.76	99.99
LZ3	Sieve	0.063	0.045	30.72	19.7	21.33	11.66	0	0	11.27	5.34	0	0	0	0	0	0	0	0	0	0	0		30.72	32.99	19.7	11.27	5.34	0	100.02
LZ4	Sieve	0.25	0.18	13.52	14.3	34.6	0	0	0	22.2	15.3	0	0	0	0	0	0	0	0	0	0	0		13.52	34.6	14.3	22.2	15.3	0	99.92
LZ5	Sieve	0.18	0.125	48.7	6.3	25.15	10.9	0	0	2.81	5.15	0	0	0	0	0	0.66	0.33	0	0	0	0		48.7	36.05	6.3	2.81	5.15	0.99	100
LZ6	Sieve	0.125	0.09	43.71	14.26	24.95	2.73	0	0	2.96	10.07	0	0	0	0	0	1.32	0	0	0	0	0		43.71	27.68	14.26	2.96	10.07	1.32	100
LZ7	Sieve	0.09	0	24.83	2.6	14.13	0	0	0	1.59	3.3	0	0	0	0	0	46.82	0	1.98	4.76	0	0		24.83	14.13	2.6	1.59	3.3	53.56	100.01
LZ8	Specimen			0	0	4.8	22.3	0	2.5	17.6	0	0	0	32.9	0	19.9	0	0	0	0	0	0		0	27.1	0	17.6	0	0	44.7
LZ9	Bulk			41.42	12.05	28.68	8.83	0	0	2.62	6.41	0	0	0	0	0	0	0	0	0	0	0		41.42	37.51	12.05	2.62	6.41	0	100.01
LZ10	Bulk			40.54	7.3	26.7	14.7	0	0	2.77	7.93	0	0	0	0	0	0	0	0	0	0	0		40.54	41.4	7.3	2.77	7.93	0	99.94
LZ11	Specimen			7	0	0	0	0	0	0	0	12.1	13.6	17.3	0	38.9	0	0	11.1	0	0	0		7	0	0	0	0	23.2	30.2
LZ12	Bulk			14.56	0	0	0	48	22.36	0	0	0	0	0	0	0	1.71	0	5.26	0	8.1	0		14.56	0	0	0	0	6.97	21.53
LZ13	Bulk			27.31	0	0	0	30.37	13.22	0	0	0	0	0	0	0	0	2.42	17.69	0	0	0		27.31	0	0	0	0	20.11	47.42
LZ14	Specimen			0	0	9.3	0	0	0	0	0	36.42	2.15	12.18	0	1.26	2.49	0	36.19	0	0	0		0	9.3	0	0	0	75.1	84.4
3m_n2	Specimen			23	0	0	0	0	0	0	0	0	0	0	16.31	60.7	0	0	0	0	0	0		23	0	0	0	0	0	23
5_n4	Specimen			2.72	0	0	5.02	0	17.99	0	0	20.55	17.98	20.37	0	0	0	0	0	0	0	6.62		2.72	5.02	0	0	0	20.55	28.29
LZ1	SPRZ01	Lubec, Spark Plug, E. parma beds, surface, 0 .125mm - 0.09mm washed
LZ2	SPRZ02	Lubec, Spark Plug, E. parma beds, surface, 0.09mm - 0.063mm washed
LZ3	SPRZ03	Lubec, Spark Plug, E. parma beds, surface, 0.063 - 0.045mm washed
LZ4	L-1 #60	Lubec, Spark Plug, E. parma beds, surface 0.25mm - 0.18mm unwashed
LZ5	L-1 #80	Lubec, Spark Plug, E. parma beds, surface 0.18mm - 0.125mm unwashed
LZ6	L-1 #120	Lubec, Spark Plug, E. parma beds, surface 0.125mm - 0.09mm unwashed
LZ7	L-1 #170	Lubec, Spark Plug, E. parma beds, surface < 0.09mm unwashed
LZ8	Eparma	Diverticula extracts - Combined 20 specimens
LZ9	Spark Plug	Lubec, Spark Plug, E. parma beds, reduced zone, unsieved
LZ10	Barr Rd	Lubec, Barr Rd, E. parma beds, surface, unsieved
LZ11	Puerta Vallarta	M. notabilis, Internal (via breaking) 6 specimens combined
LZ12	Playa Organos	Sediment Playa Organos, Costa Rica, unsieved
LZ13	Buena Vista	Sediment Playa Buena Vista, Costa Rica, unsieved
LZ14	Mellita notabilis	Internal (via breaking) 4 specimens, Playa Buena Vista
2nd - 1		Grayton Beach, FL
3m_n2		Mellita tenuis
5_n4		Lanthonia longifissa
